**Nieh, J. C. and Sánchez, D.** Effect of food quality, distance and height on thoracic temperature in the stingless bee *Melipona panamica*. *J. Exp. Biol.* **208**, 3933-3943

On the title page of this paper, Daniel Sanchez was incorrectly affiliated to *Division of Biological Sciences, Section of Ecology, Behavior, and Evolution, University of California San Diego, MC#0116, 9500 Gilman Drive, La Jolla, CA 92093-0116, USA*

The correct affiliation should have read:

*El Colegio de la Frontera Sur, Carretera Antiguo Aeropuerto km 2.5, 30700 Tapachula, Chiapas, Mexico.*

We apologise for any inconvenience caused by this error.
